# Supplementary material for: Recommendations for a Better Understanding of Sex and Gender in the Neuroscience of Mental Health
Source: PubMed Central journal article supplement (PMC10837069; doi:10.1016/j.bpsgos.2023.100283), 2023-12-30
Supplement: mmc1.pdf [file mmc1.pdf]

## **SUPPLEMENTARY INFORMATION**

### **Recommendations for a Better Understanding of Sex and Gender in Neuroscience of Mental Health**

*Wierenga et al.*

Supplementary box 1. *Recommended recording standard on sex and gender identity*

We recommend to include the following three questions to the recording standards to assess biological sex and gender identity:

What is your sex recorded at birth?

I was assigned female at birth

I was assigned male at birth

I was born Intersex and was assigned female at birth

I was born Intersex and was assigned male at birth

I was born Intersex and my sex is not entirely clear

What is your current recorded sex?

Female

Male

Intersex \_\_\_\_\_

What is your current gender identity?

Woman

Man

Non-binary

Prefer to self-describe: \_\_\_\_\_

BOX 2. Barriers and Recommendations for Human Neuroscientific Research on Sex and Gender in Mental Health

| Barriers                                                                                                                     | Recommendations                                                                                                                                                                        |
|------------------------------------------------------------------------------------------------------------------------------|----------------------------------------------------------------------------------------------------------------------------------------------------------------------------------------|
| <b>Research practices and methods - recording</b>                                                                            |                                                                                                                                                                                        |
| 'Sex' and 'gender' terminologies are often conflated in scientific literature                                                | Explain 'sex' and 'gender' terms in academic papers (e.g. use sex/gender if mechanisms are unknown)                                                                                    |
| Sex and gender related factors are not binary (e.g. intersex, gender identity)                                               | Use standardized recording of sex and gender identity                                                                                                                                  |
|                                                                                                                              | Use stakeholder engagement in research cycle to keep constructs and measures up to date                                                                                                |
| The term 'gender' is multifaceted                                                                                            | Be clear about what construct you are referring to (e.g. gender identity or social cultural gender effects)                                                                            |
| <b>Research practices and methods - Analysis</b>                                                                             |                                                                                                                                                                                        |
| Sex and gender interact                                                                                                      | Implement the biopsychosocial model                                                                                                                                                    |
| Sex and gender interactions vary across the lifespan                                                                         | Interdisciplinary collaborative efforts are key to solve differential pathways of sex and gender and how they interact                                                                 |
|                                                                                                                              | Collaborative multidisciplinary efforts are time consuming and funding is needed                                                                                                       |
| Sex (and gender) related endpoints are not always binary                                                                     | This requires the implementation of non-binary analysis (e.g. data driven methods, or variability comparisons)                                                                         |
| <b>Diagnosis and treatment</b>                                                                                               |                                                                                                                                                                                        |
| Applying scientific knowledge in clinical practice is currently suboptimal                                                   | Involve stakeholders in all phases of the research cycle to improve translationality                                                                                                   |
| Highly focused research questions do not line up with a holistic approach warranted when helping patients                    | Integrate qualitative and quantitative research designs                                                                                                                                |
| Group-based models and binary approaches do not fully capture neurodiversity and non-binary seks or gender related endpoints | Apply novel analysis methods that capture variability                                                                                                                                  |
|                                                                                                                              | Capitalize on the advantages of big data to move beyond the classical case-control paradigm                                                                                            |
| <b>Stakeholder collaborations</b>                                                                                            |                                                                                                                                                                                        |
| The societal sensitivity of sex and gender research may withhold researchers from science communication                      | Involve stakeholders with various backgrounds at different levels of research design to e.g. discuss how to best communicate findings                                                  |
| There is a lack of access to training science communication and stakeholder engagement practices                             | Develop training programs and implement this in curricula                                                                                                                              |
| Open science practices and stakeholder collaborations are currently not rewarded and only to a limited extent funded         | Reward and recognize open science initiatives of individual researchers and provide funding opportunities for science communication, open science and stakeholder engagement practices |
